# Supplementary material
Source: HighWire-hosted journal article supplement (https://www.g3journal.org/content/suppl/2014/11/11/g3.114.014555)
Supplement: FigureS4.pdf [file FigureS4.pdf]

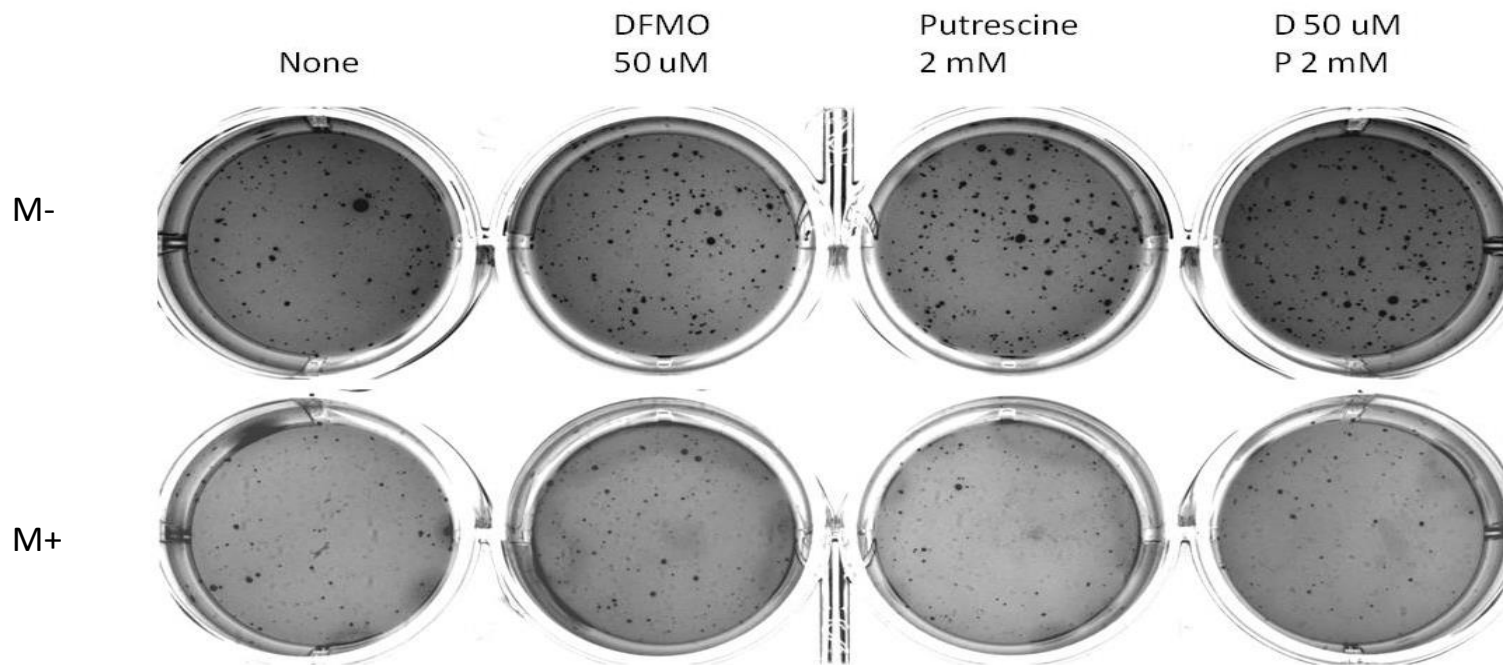

**Figure S4** Affect of DFMO and putrescine on HT1080 cells. Indicated cells were grown in soft agar as described in methods. Either nothing, DFMO (D), Putrescine (P), or both were added as indicated. Pictures were taken after 16 days.
